# Supplementary material for: Ctenophore extracellular DNA traps demonstrate conserved antimicrobial behaviors present at the emergence of animals
Source: Research Square preprint supplement (doi:10.21203/rs.3.rs-1535199/v1), 2022-04-22
Supplement: Supplementary file 1 [file 97c968d82f331797e4317fbd.docx]

**Supplemental Figures and Legends**


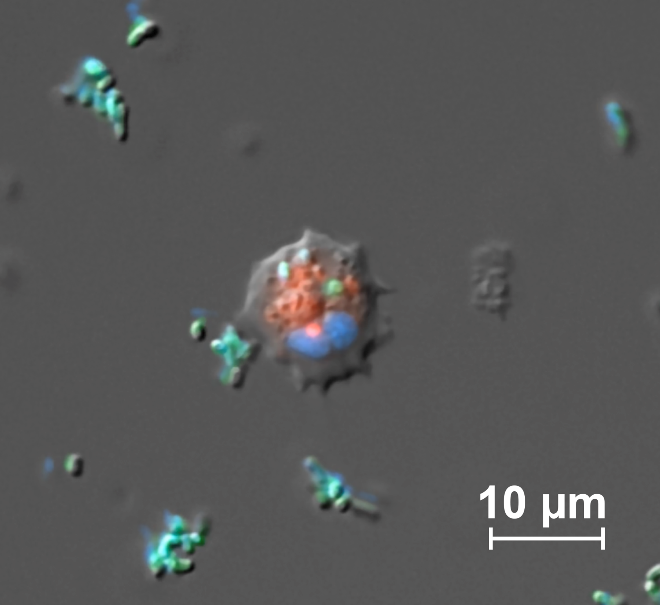


**Supp. Figure 1**: Merged brightfield and fluorescent image of a live *Mnemiopsis* motile, stellate cell that has phagocytosed fluorescent *E. coli* (green). Nuclei are labeled with Hoechst (blue). Lysosomes are labeled with Lysotracker-redDND99 (red). Scale bar is 10 μm.


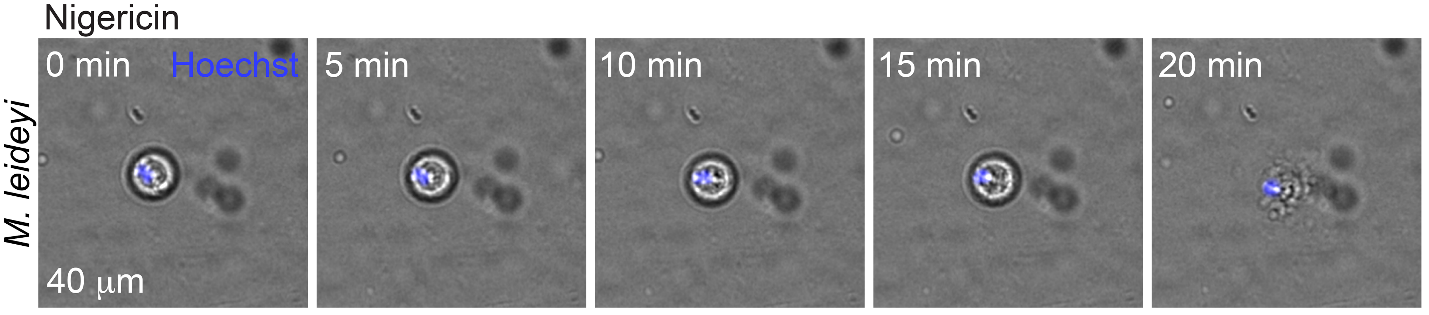


**Supp. Figure 2**: Merged brightfield and fluorescent images of video stills of a live *Mnemiopsis* motile, stellate cell undergoing ETosis following exposure to the K+ ionophore nigericin. Time stamps denote how long the expulsion of nuclear material occurs. Nuclei are labeled with Hoechst (blue).


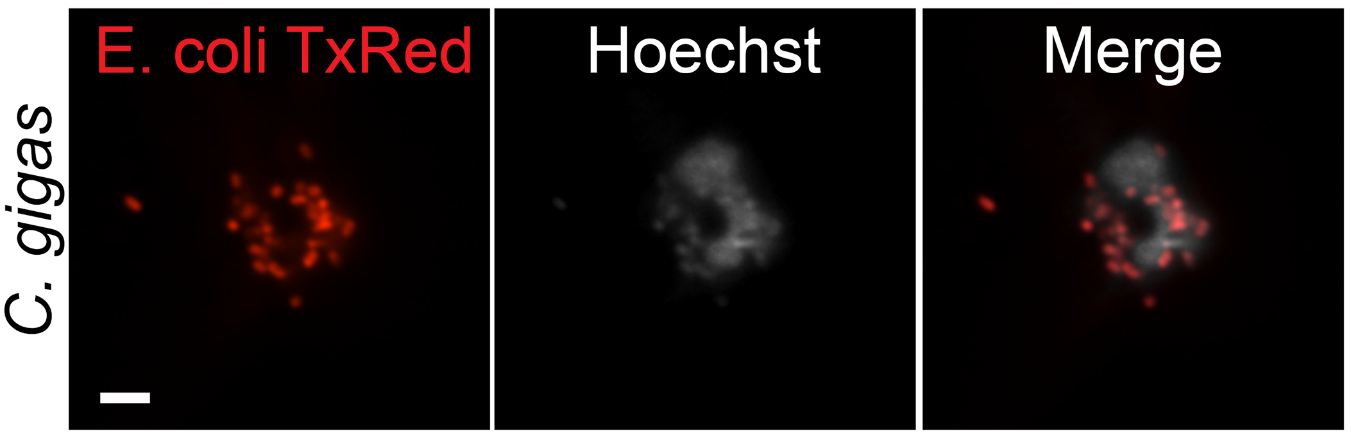


**Supp. Figure 3**: Confocal image of a *C. gigas* hemocyte that has undergone ETosis in response to exposure to Tx-red-*E. coli.* Individual bacteria are entangled in the expelled nuclear material. Scale bar is 5 μm.


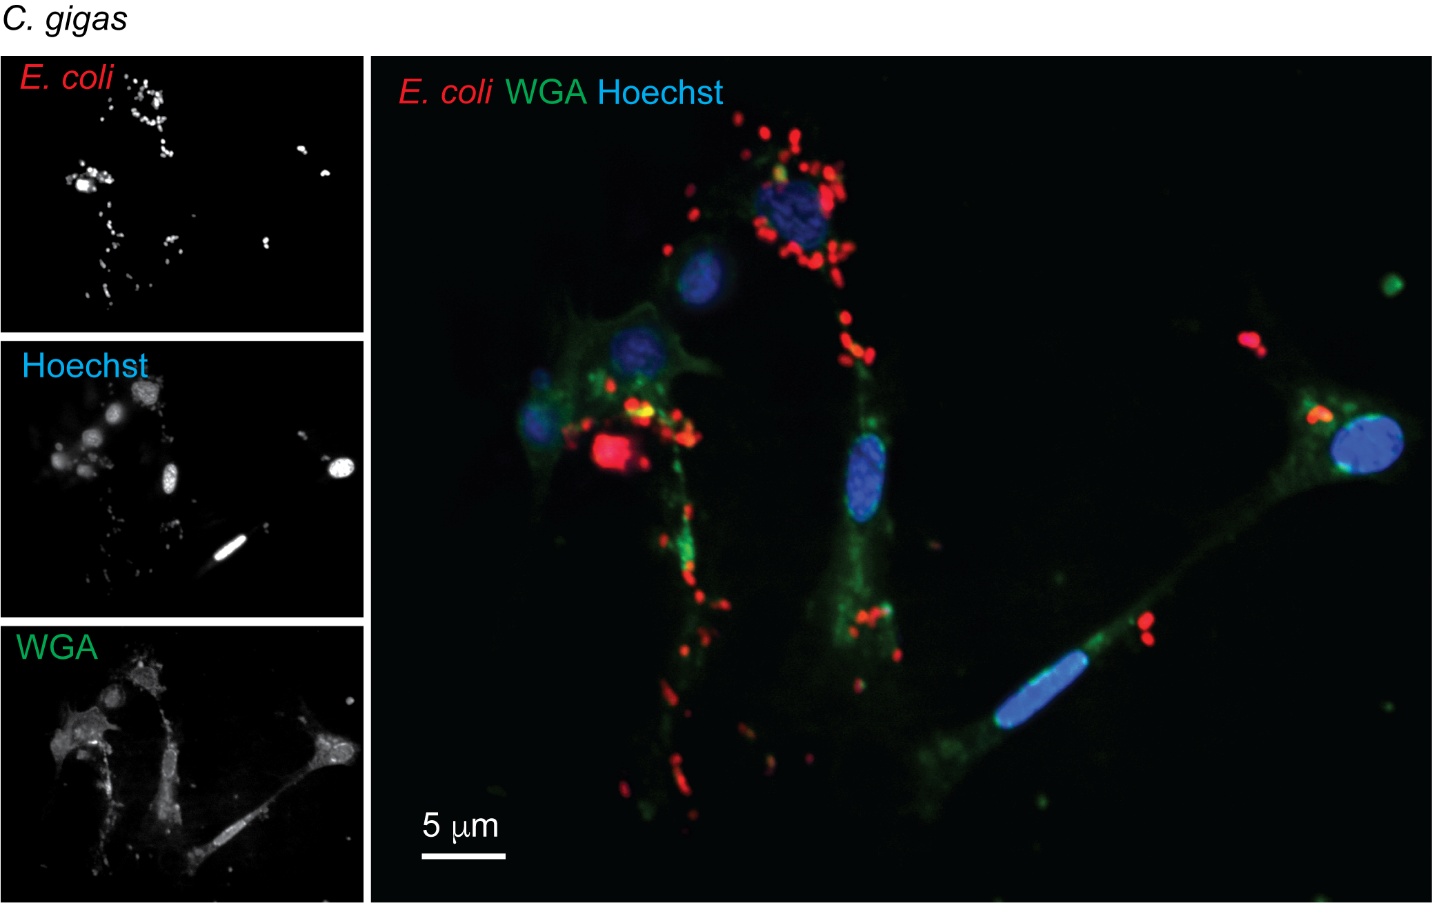


**Supp. Figure 4**: Confocal image of phagocytic *C. gigas* hemocytes that have engulfed Tx-red-labeled *E. coli.* Hemocyte cell membranes are labeled with WGA (green). Nuclei are labeled with Hoechst (blue). Scale bar is 5 μm.
